# Supplementary material for: Planning tiger recovery: Understanding intraspecific variation for effective conservation
Source: PubMed Central journal article supplement — Sci Adv. 2015 Jun 26;1(5):e1400175. doi: 10.1126/sciadv.1400175 (PMC4640610; doi:10.1126/sciadv.1400175), 2015-06-26
Supplement: 1400175_SM.pdf [file 1400175_SM.pdf]

## Supplementary Materials for **Planning tiger recovery: Understanding intraspecific variation for effective conservation**

Andreas Wilting, Alexandre Courtiol, Per Christiansen, Jürgen Niedballa, Anne K. Scharf, Ludovic Orlando, Niko Balkenhol, Heribert Hofer, Stephanie Kramer-Schadt, Jörns Fickel, Andrew C. Kitchener

Published 26 June 2015, *Sci. Adv.* **1**, e1400175 (2015)

DOI: 10.1126/sciadv.1400175

### **This PDF file includes:**

- Fig. S1. Summary of the work flow to predict the historical distribution of tigers.
- Fig. S2. Predicted historical distribution of tigers *P. tigris* (top left) and MaxEnt analysis for the nine putative subspecies.
- Fig. S3. Phenotypic space across all nine putative subspecies of tigers.
- Fig. S4. Comparison of the nine putative tiger subspecies.
- Table S1. Sources and details of male specimens included in the craniodental analysis.
- Table S2. Sources and details of female specimens included in the craniodental analysis.
- Table S3. The 41 craniodental characters and their contribution to the first four principal components.
- Table S4. Sources and details of the specimens or photographs included in the pelage analysis.
- Table S5. Means and SDs for the six pelage characters across the nine putative subspecies.
- Table S6. The six pelage characters and their contribution to the first four principal components.
- Table S7. Number of occurrence records including the references for each of the nine putative subspecies used for the PCA and for the species distribution modeling (see Materials and Methods for details).
- Table S8. Definitions of the four functional habitats and the eco-regions assigned to them.
- Table S9. List of the tiger prey species.
- Table S10. The 29 ecological variables and their contribution to the first four principal components.

Table S11. Simulation of bootstrap values of nodes pooling two, three, or four putative subspecies in the neighbor-joining tree.

Table S12. Niche overlap between putative subspecies as computed by ENMTools.

Table S13. Sources and details of specimens included in the molecular analysis in addition to the sequences from Luo *et al.* (8), Driscoll *et al.* (16), and GenBank accession no. JF357969 (11) (SUM9).

Table S14. Details of mitochondrial primer sets used in addition to the eight primer sets described by Driscoll *et al.* (16).

Table S15. Population summary statistics calculated for the short and long mtDNA data sets.

Table S16. Nucleotide diversity of pantherine cats.

Table S17. Divergence dates in years before present derived from the short and long mtDNA data sets.

Table S18. Pairwise comparison between the two tiger subspecies *P. tigris tigris* and *P. tigris sondaica* for the craniodental characteristics using the Mann-Whitney *U* test ( $\sigma$ :  $n_{tigris} = 64$ ,  $n_{sondaica} = 38$ ;  $\omega$ :  $n_{tigris} = 55$ ,  $n_{sondaica} = 44$ ).

Table S19. Pairwise comparison between the two tiger subspecies *P. tigris tigris* and *P. tigris sondaica* for the pelage characteristics using the Mann-Whitney *U* test ( $n_{tigris} = 89$ ,  $n_{sondaica} = 25$ ).

Table S20. Pairwise comparison between the two tiger subspecies *P. tigris tigris* and *P. tigris sondaica* for the continuous ecological variables (climate) using the Mann-Whitney *U* test ( $n_{tigris} = 428$ ,  $n_{sondaica} = 50$ ).

Table S21. Pairwise comparison between the two tiger subspecies *P. tigris tigris* and *P. tigris sondaica* for the categorical ecological variables (functional prey groups and functional habitat) using Fisher's exact test ( $n_{tigris} = 428$ ,  $n_{sondaica} = 50$ ).

References (72–87)

## Supplementary Materials

Fig S1. Summary of the work flow to predict the historical distribution of tigers.

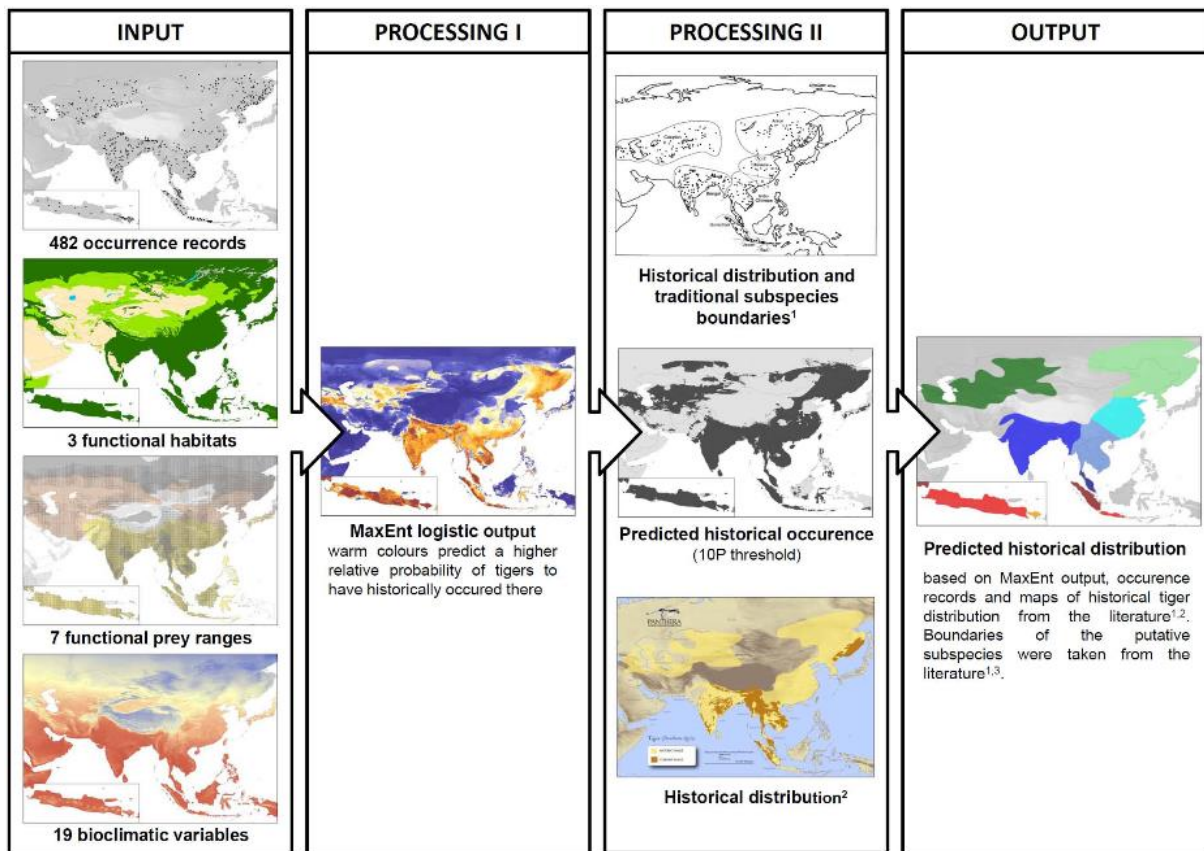

Fig S1. Summary of the work flow to predict the historical distribution of tigers.

**Fig S2. Predicted historical distribution of tigers *P. tigris* (top left) and MaxEnt analysis for the nine putative subspecies.**

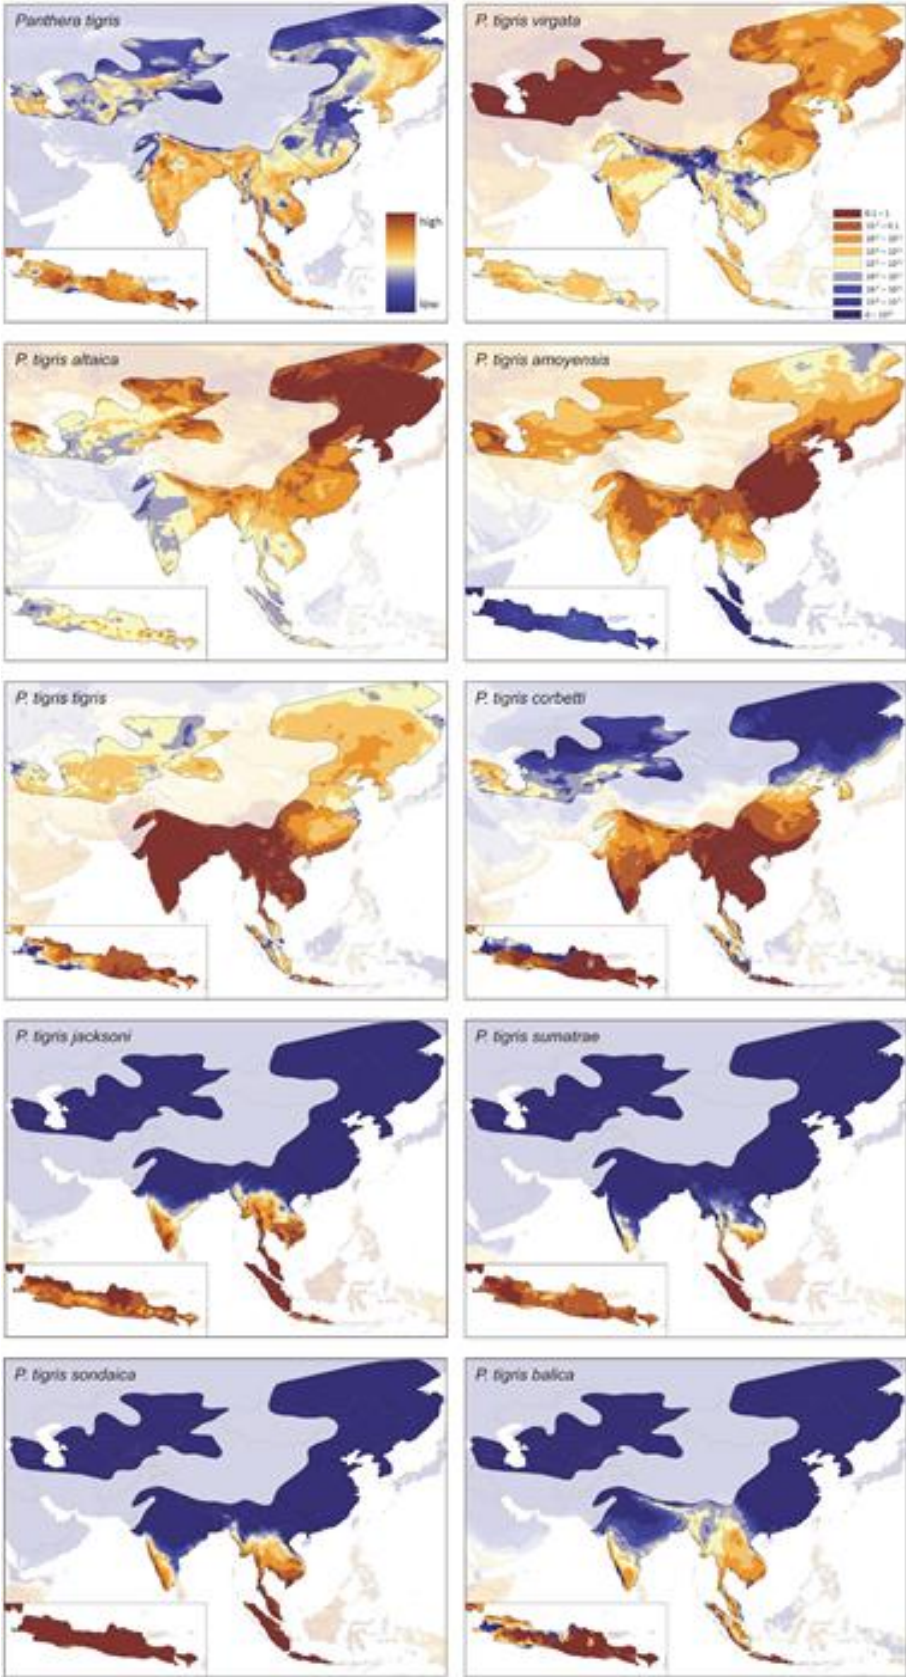

**Fig S2. Predicted historical distribution of tigers *P. tigris* (top left) and MaxEnt analysis for the nine putative subspecies.** These single models for the putative subspecies formed the basis for the niche similarity analysis using ENMTools.

**Fig S3. Phenotypic space across all nine putative subspecies of tigers defined by principal components three and four.**

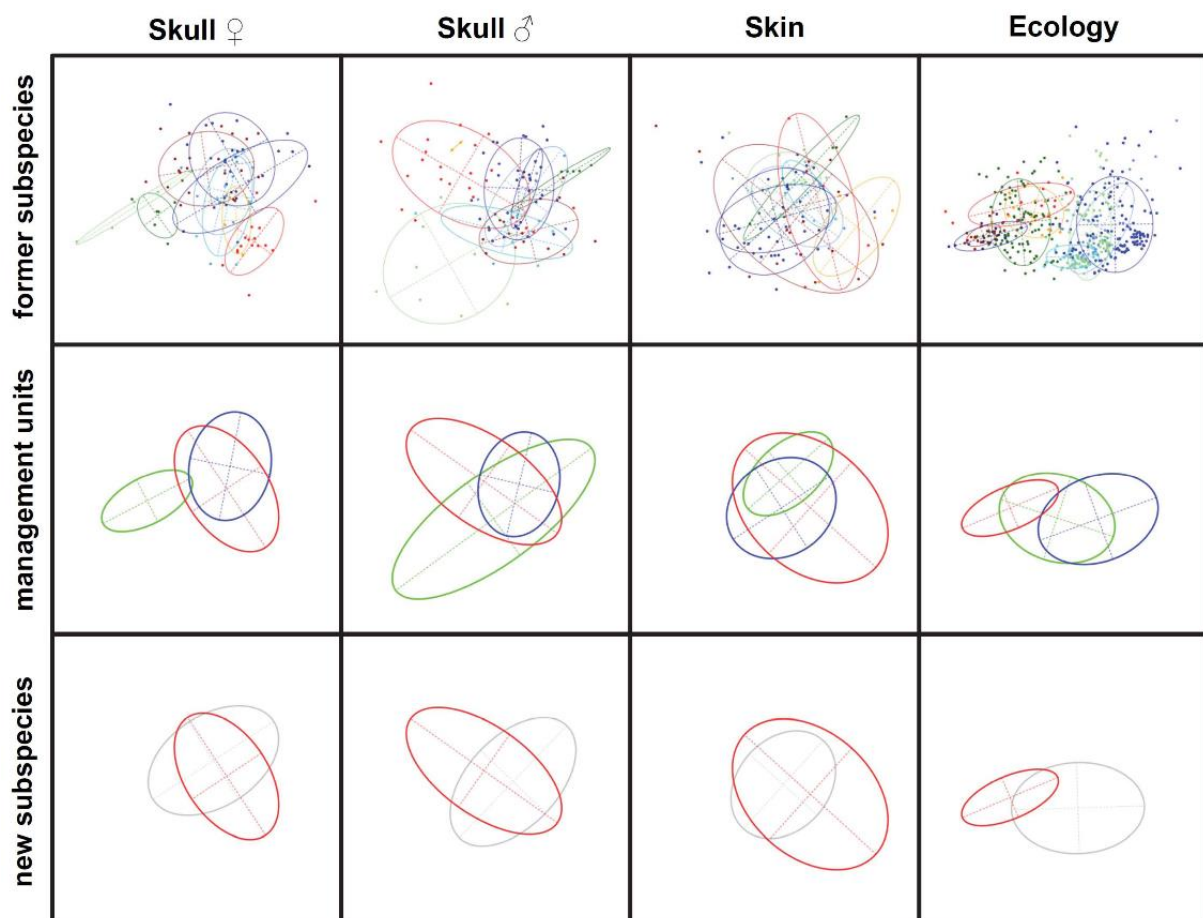

**Fig S3. Phenotypic space across all nine putative subspecies of tigers defined by principal components three and four.** Multivariate analyses of skull traits (females and males), pelage and ecological preferences depicted as the 1.5 inertia ellipse for all nine former subspecies, for the three management units and for the two new subspecies displayed on the plane defined by principal components three and four.

**Fig S4. Comparison of the nine putative tiger subspecies.**

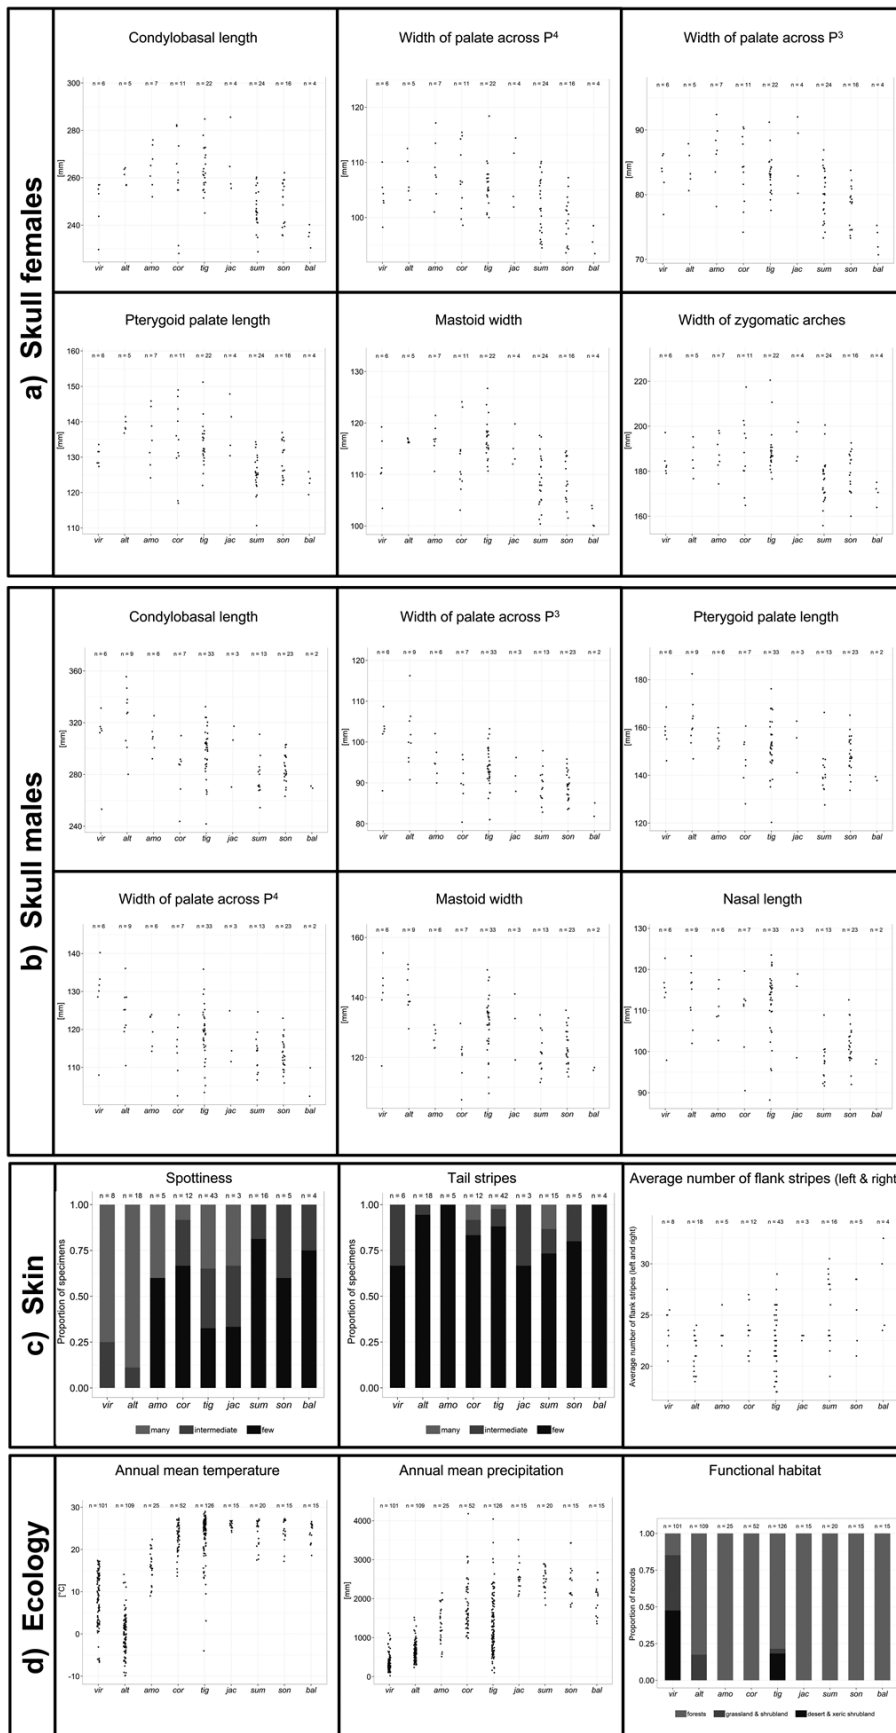

**Fig S4. Comparison of the nine putative tiger subspecies.** For skull (**a**, females, **b**, males) the raw measures of the six variables which explained most of the variance in the multivariate analyses are shown. For the three most important variables for **c** pelage and **d** ecology categorical and ordinal data are shown as bar charts.

**Table S1: Sources and details of male specimens included in the craniodental analysis.**

| No | Putative subspecies | Institution | Specimen no. | Geographical origin                  |
|----|---------------------|-------------|--------------|--------------------------------------|
| 1  | <i>altaica</i>      | CN          | 5698         | Knuthenborg Wildlife Park            |
| 2  | <i>altaica</i>      | CN          | 5687         | Knuthenborg Wildlife Park            |
| 3  | <i>altaica</i>      | RMNH        | 19925        | Leipzig Zoo/Blijdorp Diergarde       |
| 4  | <i>altaica</i>      | RMNH        | n            | Omgering, Vladivostok, 1897          |
| 5  | <i>altaica</i>      | SMF         | 55557        | Weishaho St., East Mandchuria, China |
| 6  | <i>altaica</i>      | ZMB         | 15640        | Mandchuria, Southern Siberia         |
| 7  | <i>altaica</i>      | ALB ZOO     | -            | Captive stock, Aalborg Zoo           |
| 8  | <i>altaica</i>      | ALB ZOO     | -            | Captive stock, Aalborg Zoo           |
| 9  | <i>altaica</i>      | PC coll     | -            | Cast specimen, PC collection         |
| 10 | <i>amoyensis</i>    | BMNH        | 8.8.11.19    | China                                |
| 11 | <i>amoyensis</i>    | BMNH        | 56037        | Hsinganfu, Shinsi, China             |
| 12 | <i>amoyensis</i>    | BMNH        | 52574        | South China/Moscow Zoo               |
| 13 | <i>amoyensis</i>    | AMNH        | 45519        | Fukien Province, Futsing, China      |
| 14 | <i>amoyensis</i>    | AMNH        | 45520        | Fukien Province, Futsing, China      |
| 15 | <i>amoyensis</i>    | BMNH        | 8.8.11.20    | China                                |
| 16 | <i>balica</i>       | BMNH        | 1938.3.14.5  | Bali                                 |
| 17 | <i>balica</i>       | BMNH        | 1937.12.1.2  | Bali                                 |
| 18 | <i>corbetti</i>     | BMNH        | 30.1.4.2     | Katha District, West Bhamo, Burma    |
| 19 | <i>corbetti</i>     | BMNH        | 17.7.8.1     | Upper Chindwin, Burma                |
| 20 | <i>corbetti</i>     | BMNH        | 33.7.9.4     | Thailand                             |
| 21 | <i>corbetti</i>     | BMNH        | 10.3.10.8    | Nhaliang, Vietnam                    |
| 22 | <i>corbetti</i>     | BMNH        | 32.5.2.1     | Lower Burma                          |
| 23 | <i>corbetti</i>     | MNHN        | 1992-3       | Indochina                            |
| 24 | <i>corbetti</i>     | MNHN        | 1964-247     | Bildahur Region, Indochina           |
| 25 | " <i>jacksoni</i> " | SMF         | 21239        | Southern Thailand, Frankfurt Zoo     |
| 26 | " <i>jacksoni</i> " | BMNH        | 21.12.29.1   | Malay Peninsula                      |
| 27 | " <i>jacksoni</i> " | BMNH        | 30.5.22.1    | Malay Peninsula                      |
| 28 | <i>sondaica</i>     | BMNH        | 67.4.12.194  | Java                                 |
| 29 | <i>sondaica</i>     | BMNH        | 67.4.12.192  | Java                                 |
| 30 | <i>sondaica</i>     | BMNH        | 67.4.12.198  | Java                                 |
| 31 | <i>sondaica</i>     | BMNH        | 1937.12.1.1  | Java                                 |
| 32 | <i>sondaica</i>     | BMNH        | 20.11.14.2   | Java                                 |
| 33 | <i>sondaica</i>     | CN          | 19           | Java                                 |
| 34 | <i>sondaica</i>     | CN          | 15           | Java                                 |
| 35 | <i>sondaica</i>     | CN          | 23           | Surabaya, Java                       |
| 36 | <i>sondaica</i>     | RMNH        | 235/38       | Udjun Kulon, Western Java            |
| 37 | <i>sondaica</i>     | RMNH        | 23088        | South Banjoewangi, Eastern Java      |

|    |                 |      |              |                                     |
|----|-----------------|------|--------------|-------------------------------------|
| 38 | <i>sondaica</i> | RMNH | 264          | Java                                |
| 39 | <i>sondaica</i> | RMNH | d            | Java                                |
| 40 | <i>sondaica</i> | RMNH | 59/33        | Udjun Kulon, Western Java           |
| 41 | <i>sondaica</i> | RMNH | 1929         | Java/ Blijdorp Diergarde, Rotterdam |
| 42 | <i>sondaica</i> | SMF  | 16263        | Java                                |
| 43 | <i>sondaica</i> | SMF  | 16264        | Java                                |
| 44 | <i>sondaica</i> | SMNS | 31901        | Java                                |
| 45 | <i>sondaica</i> | SMNS | 7628         | Java/Hamburg Zoo                    |
| 46 | <i>sondaica</i> | ZMB  | 56040        | Drokja, Java                        |
| 47 | <i>sondaica</i> | ZMB  | 28793        | Java                                |
| 48 | <i>sondaica</i> | ZMB  | 56039        | Java                                |
| 49 | <i>sondaica</i> | ZMB  | 28794        | Java                                |
| 50 | <i>sondaica</i> | ZMB  | 14365        | Java                                |
| 51 | <i>sumatrae</i> | BMNH | 39.334       | Sumatra                             |
| 52 | <i>sumatrae</i> | BMNH | 19.11.12.13  | Sumatra                             |
| 53 | <i>sumatrae</i> | RMNH | 2174         | Deli, Sumatra                       |
| 54 | <i>sumatrae</i> | RMNH | 11633        | Omgeving, Central Sumatra           |
| 55 | <i>sumatrae</i> | RMNH | 23087        | Eastern Sumatra/Blijdorp Diergarde  |
| 56 | <i>sumatrae</i> | RMNH | 38426        | Sumatra                             |
| 57 | <i>sumatrae</i> | RMNH | 23085        | Eastern Sumatra/Blijdorp Diergarde  |
| 58 | <i>sumatrae</i> | RMNH | 3529         | Bankinang, Western Sumatra          |
| 59 | <i>sumatrae</i> | RMNH | 4694         | Boea, Western Sumatra               |
| 60 | <i>sumatrae</i> | RMNH | 24912        | Tandjong Morawa, Deli, Sumatra      |
| 61 | <i>sumatrae</i> | SMF  | 16262        | Deli, Sumatra                       |
| 62 | <i>sumatrae</i> | ZMB  | 52482        | Medan, Sumatra/Berlin Tierpark      |
| 63 | <i>sumatrae</i> | ZMB  | 56050        | Central Sumatra                     |
| 64 | <i>tigris</i>   | BMNH | 82.12.10.1   | Bengal, India                       |
| 65 | <i>tigris</i>   | BMNH | 27.8.8.1     | India                               |
| 66 | <i>tigris</i>   | BMNH | 27.7.18.2    | India                               |
| 67 | <i>tigris</i>   | BMNH | 35.5.7.2     | India                               |
| 68 | <i>tigris</i>   | BMNH | 7.10.18.1    | India                               |
| 69 | <i>tigris</i>   | BMNH | 31.1.10.2    | India                               |
| 70 | <i>tigris</i>   | BMNH | 32.5.7.3     | India                               |
| 71 | <i>tigris</i>   | BMNH | 27.9.17.1    | India                               |
| 72 | <i>tigris</i>   | BMNH | 33.9.7.1     | India                               |
| 73 | <i>tigris</i>   | BMNH | 1938.8.12.5  | India                               |
| 74 | <i>tigris</i>   | BMNH | 61.452       | India                               |
| 75 | <i>tigris</i>   | BMNH | 30.3.2.2     | Assam                               |
| 76 | <i>tigris</i>   | BMNH | 21.6.9.2     | Assam                               |
| 77 | <i>tigris</i>   | BMNH | 58.6.24.120  | Nepal                               |
| 78 | <i>tigris</i>   | BMNH | 30.3.2.3     | Assam                               |
| 79 | <i>tigris</i>   | BMNH | 114b         | Nepal                               |
| 80 | <i>tigris</i>   | BMNH | 45.1.8.28    | India                               |
| 81 | <i>tigris</i>   | BMNH | 21.6.9.1     | Bhutan                              |
| 82 | <i>tigris</i>   | BMNH | 83.10.23.1   | Nepal                               |
| 83 | <i>tigris</i>   | BMNH | 32.4.16.1    | Nepal                               |
| 84 | <i>tigris</i>   | BMNH | 1938.8.12.1  | India                               |
| 85 | <i>tigris</i>   | BMNH | 1849.7.27.4  | India                               |
| 86 | <i>tigris</i>   | BMNH | 1938.8.12.3  | India                               |
| 87 | <i>tigris</i>   | BMNH | 1884.10.30.3 | India                               |
| 88 | <i>tigris</i>   | CN   | 772          | Maraghat, India                     |

---



|     |                |      |          |                          |
|-----|----------------|------|----------|--------------------------|
| 89  | <i>tigris</i>  | CN   | 773      | Jalpaiguri, India        |
| 90  | <i>tigris</i>  | CN   | 10       | Bengal India             |
| 91  | <i>tigris</i>  | CN   | CN774    | Jalpaiguri, India        |
| 92  | <i>tigris</i>  | CN   | CN21     | Assam                    |
| 93  | <i>tigris</i>  | SMNS | 18921    | India                    |
| 94  | <i>tigris</i>  | ZMB  | 56041    | India                    |
| 95  | <i>tigris</i>  | ZMB  | 22150    | Assam/Berlin Zoo 1915    |
| 96  | <i>tigris</i>  | ZMB  | 87040    | Assam/Berlin Zoo 1915    |
| 97  | <i>virgata</i> | BMNH | 88.8.7.1 | Afghanistan              |
| 98  | <i>virgata</i> | ZMB  | 12057    | Northern Iran/Berlin Zoo |
| 99  | <i>virgata</i> | ZML  | 8679     | Uzbekistan               |
| 100 | <i>virgata</i> | ZML  | 9387     | Kazapa                   |
| 101 | <i>virgata</i> | ZML  | 33.110   | Turkmenistan             |
| 102 | <i>virgata</i> | ZML  | 14.977   | Turkmenistan             |

\* ALB ZOO: collections at Aalborg Zoo; AMNH: American Museum of Natural History (New York); BMNH: British Natural History Museum (London); CN: Zoological Museum (Copenhagen); MNHN: Museum National d'Histoire Naturelle (Paris); PC coll.: private collection of Per Christiansen; RMNH: National Museum of Natural History (Leiden); SMF: Naturmuseum Senckenberg (Frankfurt); SMNS: Staatliches Museum für Naturkunde (Stuttgart); ZMB: Museum für Naturkunde (Berlin); ZML: Zoological Institute of the Russian Academy of Sciences (St. Petersburg).

**Table S2: Sources and details of female specimens included in the craniodental analysis.**

| No | Putative subspecies | Institution | Specimen no. | Geographical origin                 |
|----|---------------------|-------------|--------------|-------------------------------------|
| 1  | <i>altaica</i>      | ZMB         | 68380        | Chabarowsk District, Ussuri River   |
| 2  | <i>altaica</i>      | ZMB         | 56038        | Amur                                |
| 3  | <i>altaica</i>      | ALB ZOO     | -            | Captive stock, Aalborg Zoo          |
| 4  | <i>altaica</i>      | ALB ZOO     | -            | Captive stock, Aalborg Zoo          |
| 5  | <i>altaica</i>      | ALB ZOO     | -            | Captive stock, Aalborg Zoo          |
| 6  | <i>amoyensis</i>    | BMNH        | 13.5.1.1     | West, China, Szechuan               |
| 7  | <i>amoyensis</i>    | BMNH        | 7614         | Amoy, S.E. China                    |
| 8  | <i>amoyensis</i>    | ZMB         | 56036        | Sao Kay, Tonkin, N.E. Vietnam       |
| 9  | <i>amoyensis</i>    | ZMB         | 56048        | Nintschwang, China                  |
| 10 | <i>amoyensis</i>    | ZMB         | 56026        | Tonkin, N.E. Vietnam                |
| 11 | <i>amoyensis</i>    | AMNH        | 47863        | Fujian Province, Nanping, China     |
| 12 | <i>amoyensis</i>    | AMNH        | 45516        | China                               |
| 13 | <i>balica</i>       | BMNH        | 1938.3.14.6  | Bali                                |
| 14 | <i>balica</i>       | SMF         | 2576         | Den Pasar, Southern Bali (holotype) |
| 15 | <i>balica</i>       | SMNS        | 18922        | Poeloekan, Central Bali             |
| 16 | <i>balica</i>       | SMNS        | 18923        | Medevi, Central Bali                |
| 17 | <i>corbetti</i>     | BMNH        | 30.1.3.1     | Yu River, Upper Chindwin            |
| 18 | <i>corbetti</i>     | BMNH        | 30.1.4.3     | Hangapru, Mergui, Burma             |
| 19 | <i>corbetti</i>     | BMNH        | 32.5.2.2     | Lower Burma                         |
| 20 | <i>corbetti</i>     | BMNH        | 56.5.6.54    | Mergui, Burma                       |
| 21 | <i>corbetti</i>     | BMNH        | 32.11.9.1    | Thaungyin Valley, Burma             |
| 22 | <i>corbetti</i>     | BMNH        | 32.8.19.3    | Upper Chindwin                      |
| 23 | <i>corbetti</i>     | BMNH        | 32.8.19.1    | Upper Chindwin                      |

|    |                     |      |             |                                     |
|----|---------------------|------|-------------|-------------------------------------|
| 24 | <i>corbetti</i>     | CN   | 3446        | Bandon District, South Thailand     |
| 25 | <i>corbetti</i>     | CN   | 7390        | North Thailand                      |
| 26 | <i>corbetti</i>     | CN   | 1371        | Thailand                            |
| 27 | <i>corbetti</i>     | MNHN | 1949-331    | Laos                                |
| 28 | " <i>jacksoni</i> " | BMNH | 30.5.22.1   | Malay Peninsula                     |
| 29 | " <i>jacksoni</i> " | CN   | 7389        | Malaysia ("Malaya")                 |
| 30 | " <i>jacksoni</i> " | USNM | 49478       | Malaysia                            |
| 31 | " <i>jacksoni</i> " | ZMB  | 56044       | East Malacca                        |
| 32 | <i>sondaica</i>     | BMNH | 67.4.12.199 | Java                                |
| 33 | <i>sondaica</i>     | BMNH | 1939.1643   | Java                                |
| 34 | <i>sondaica</i>     | BMNH | 67.4.12.200 | Java                                |
| 35 | <i>sondaica</i>     | BMNH | 67.4.12.201 | Java                                |
| 36 | <i>sondaica</i>     | CN   | 20          | Java                                |
| 37 | <i>sondaica</i>     | MNHN | 624         | Java                                |
| 38 | <i>sondaica</i>     | MNHN | A1878       | Java                                |
| 39 | <i>sondaica</i>     | RMNH | 15755       | Tjeuri, Java                        |
| 40 | <i>sondaica</i>     | RMNH | j           | Java                                |
| 41 | <i>sondaica</i>     | RMNH | n           | Java                                |
| 42 | <i>sondaica</i>     | RMNH | 4695        | Toeloeng Agoeng, Eastern Java       |
| 43 | <i>sondaica</i>     | SMF  | 16261       | Java                                |
| 44 | <i>sondaica</i>     | ZMB  | 7620        | Java                                |
| 45 | <i>sondaica</i>     | ZMB  | 56045       | Java                                |
| 46 | <i>sondaica</i>     | ZMB  | 14367       | Java                                |
| 47 | <i>sondaica</i>     | ZMB  | 14369       | Java                                |
| 48 | <i>sumatrae</i>     | BMNH | 39.335      | Sumatra                             |
| 49 | <i>sumatrae</i>     | BMNH | 47.449      | Sumatra                             |
| 50 | <i>sumatrae</i>     | BMNH | 30.3.3.2    | Sumatra                             |
| 51 | <i>sumatrae</i>     | BMNH | 35.4.6.2    | Sumatra                             |
| 52 | <i>sumatrae</i>     | BMNH | 35.4.6.3    | Sumatra                             |
| 53 | <i>sumatrae</i>     | BMNH | 47.450      | Sumatra                             |
| 54 | <i>sumatrae</i>     | BMNH | 35.4.6.1    | Sumatra                             |
| 55 | <i>sumatrae</i>     | CN   | 7391        | East Sumatra                        |
| 56 | <i>sumatrae</i>     | CN   | 883         | Sumatra                             |
| 57 | <i>sumatrae</i>     | RMNH | 23089       | Northern Sumatra/Blijdorp Diergarde |
| 58 | <i>sumatrae</i>     | RMNH | g           | Padang, Central Sumatra             |
| 59 | <i>sumatrae</i>     | RMNH | 872         | Painan, Pedang, Western Sumatra     |
| 60 | <i>sumatrae</i>     | RMNH | 17655       | Pedang, Western Sumatra             |
| 61 | <i>sumatrae</i>     | RMNH | 315b        | Sumatra                             |
| 62 | <i>sumatrae</i>     | RMNH | 3319        | Sumatra                             |
| 63 | <i>sumatrae</i>     | RMNH | 315a        | Sumatra                             |
| 64 | <i>sumatrae</i>     | RMNH | 4697        | Boea, west coast of Sumatra         |
| 65 | <i>sumatrae</i>     | RMNH | 4696        | Pajakambo, Padang, Western Sumatra  |
| 66 | <i>sumatrae</i>     | RMNH | 2202        | Palembang, Southern Sumatra         |
| 67 | <i>sumatrae</i>     | SMF  | 7021        | Bunga-Banda, Sumatra                |
| 68 | <i>sumatrae</i>     | SMF  | 15735       | Sumatra                             |
| 69 | <i>sumatrae</i>     | SMF  | 7020        | Bunga-Banda, Sumatra                |
| 70 | <i>sumatrae</i>     | SMF  | 16265       | Sumatra                             |
| 71 | <i>sumatrae</i>     | SMF  | 92259       | Sumatra/Frankfurt Zoo               |
| 72 | <i>tigris</i>       | BMNH | 10.7.21.1   | SW. India                           |
| 73 | <i>tigris</i>       | BMNH | 78.2456     | S. India                            |
| 74 | <i>tigris</i>       | BMNH | 29.9.23.1   | India                               |

---

|    |                |         |             |                                        |
|----|----------------|---------|-------------|----------------------------------------|
| 75 | <i>tigris</i>  | BMNH    | 78.2452     | India                                  |
| 76 | <i>tigris</i>  | BMNH    | 32.5.7.4    | India                                  |
| 77 | <i>tigris</i>  | BMNH    | 24.10.5.2   | India                                  |
| 78 | <i>tigris</i>  | BMNH    | 24.10.5.1   | India                                  |
| 79 | <i>tigris</i>  | BMNH    | 1938.8.12.4 | India                                  |
| 80 | <i>tigris</i>  | BMNH    | 34.10.18.1  | India                                  |
| 81 | <i>tigris</i>  | BMNH    | 83          | India                                  |
| 82 | <i>tigris</i>  | BMNH    | 114e        | Nepal                                  |
| 83 | <i>tigris</i>  | BMNH    | 58.6.24.122 | Nepal                                  |
| 84 | <i>tigris</i>  | BMNH    | 32.4.16.3   | Nepal                                  |
| 85 | <i>tigris</i>  | BMNH    | 32.4.16.2   | Nepal                                  |
| 86 | <i>tigris</i>  | BMNH    | 46.829      | India                                  |
| 87 | <i>tigris</i>  | CN      | 11          | Bengal, India                          |
| 88 | <i>tigris</i>  | CN      | 969         | India, Copenhagen Zoo                  |
| 89 | <i>tigris</i>  | CPH ZOO | -           | Captive stock, Copenhagen Zoo          |
| 90 | <i>tigris</i>  | MNHN    | 624B        | Bengal, India                          |
| 91 | <i>tigris</i>  | SMNS    | 6870        | India                                  |
| 92 | <i>tigris</i>  | ALB ZOO | -           | Captive stock, Aalborg Zoo             |
| 93 | <i>tigris</i>  | PC coll | -           | Cast specimen, PC collection           |
| 94 | <i>virgata</i> | BMNH    | 82.11.3.1   | Northern Iran                          |
| 95 | <i>virgata</i> | BMNH    | 86.10.15.1  | Afghanistan                            |
| 96 | <i>virgata</i> | ZMB     | 12413       | Northern Iran/Berlin Zoo               |
| 97 | <i>virgata</i> | ZMB     | 13138       | Petrowsk-Surdaya, Turkestan/Berlin Zoo |
| 98 | <i>virgata</i> | ZML     | No nr       | Turmenistan                            |
| 99 | <i>virgata</i> | ZML     | No nr       | Uzbekistan                             |

\* See Table S1 and CPH ZOO: collections at Copenhagen Zoo; USNM: US National Museum of Natural History (Smithsonian Institution, Washington DC).

**Table S3: The 41 craniodental characters and their contribution to the first four principal components. Values with very high loadings are marked in bold and with high loadings in italic.**

| No | Character                      | PC 1          |               | PC2    |        | PC3    |        | PC4    |        |
|----|--------------------------------|---------------|---------------|--------|--------|--------|--------|--------|--------|
|    |                                | ♀             | ♂             | ♀      | ♂      | ♀      | ♂      | ♀      | ♂      |
| 1  | Condylbasal length             | <b>-0.921</b> | <b>-0.940</b> | -0.081 | -0.025 | 0.076  | -0.049 | 0.005  | -0.098 |
| 2  | Posterior length               | -0.583        | -0.395        | -0.205 | -0.154 | 0.185  | 0.113  | -0.125 | -0.461 |
| 3  | Facial length                  | <i>-0.700</i> | <i>-0.700</i> | 0.150  | -0.304 | 0.172  | -0.262 | 0.369  | -0.080 |
| 4  | Upper canine width             | -0.662        | -0.694        | 0.079  | -0.207 | 0.420  | -0.327 | 0.138  | -0.092 |
| 5  | Height variable A <sup>a</sup> | -0.674        | <i>-0.714</i> | 0.048  | -0.295 | 0.169  | -0.275 | 0.046  | -0.006 |
| 6  | Height variable B <sup>b</sup> | <i>-0.712</i> | -0.658        | -0.083 | -0.340 | 0.091  | 0.102  | 0.372  | 0.149  |
| 7  | Height variable C <sup>c</sup> | <i>-0.712</i> | -0.548        | -0.110 | -0.437 | -0.058 | 0.161  | 0.364  | 0.009  |
| 8  | Height variable D <sup>d</sup> | <i>-0.784</i> | <i>-0.782</i> | -0.330 | -0.319 | 0.192  | -0.033 | 0.110  | -0.217 |
| 9  | Zygomatic width <sup>e</sup>   | -0.636        | -0.447        | -0.199 | -0.412 | -0.024 | -0.230 | 0.016  | -0.482 |
| 10 | Nasal width <sup>f</sup>       | <i>-0.717</i> | -0.652        | -0.188 | -0.452 | -0.370 | 0.115  | -0.123 | -0.009 |
| 11 | Nasal width <sup>g</sup>       | -0.543        | -0.468        | -0.435 | -0.397 | -0.356 | 0.577  | 0.290  | 0.208  |
| 12 | Width of muzzle                | <i>-0.779</i> | <i>-0.777</i> | -0.203 | -0.249 | 0.122  | -0.280 | -0.144 | -0.130 |
| 13 | Interorbital width             | <i>-0.799</i> | <i>-0.758</i> | -0.424 | -0.496 | -0.160 | 0.150  | -0.091 | 0.200  |

|                                    |                                       |               |               |        |        |        |        |        |        |
|------------------------------------|---------------------------------------|---------------|---------------|--------|--------|--------|--------|--------|--------|
| 14                                 | Postorbital width                     | -0.588        | -0.631        | -0.491 | -0.460 | -0.427 | 0.155  | -0.100 | 0.170  |
| 15                                 | Postorbital constriction              | -0.607        | -0.488        | -0.309 | -0.302 | -0.184 | 0.398  | -0.030 | 0.166  |
| 16                                 | Braincase width                       | -0.732        | -0.646        | -0.133 | -0.255 | 0.212  | 0.088  | -0.271 | 0.398  |
| 17                                 | Nasal length                          | -0.823        | <b>-0.883</b> | -0.246 | -0.079 | 0.094  | 0.108  | 0.162  | 0.097  |
| 18                                 | Pterygoid palate length               | <b>-0.873</b> | <b>-0.904</b> | 0.009  | 0.023  | 0.006  | -0.179 | -0.191 | 0.063  |
| 19                                 | Ventral posterior length              | -0.788        | <b>-0.872</b> | -0.187 | 0.012  | 0.054  | 0.189  | 0.057  | -0.089 |
| 20                                 | Width of incisors                     | -0.575        | -0.637        | 0.091  | 0.286  | 0.051  | -0.235 | -0.497 | 0.304  |
| 21                                 | Width between canines                 | -0.773        | <b>-0.881</b> | -0.353 | 0.037  | -0.118 | -0.140 | -0.143 | -0.012 |
| 22                                 | Width of palate across P <sup>3</sup> | <b>-0.912</b> | <b>-0.912</b> | -0.060 | 0.088  | -0.100 | -0.080 | -0.007 | -0.109 |
| 23                                 | Width of palate across P <sup>4</sup> | <b>-0.914</b> | <b>-0.890</b> | 0.030  | 0.120  | -0.068 | 0.038  | -0.018 | 0.043  |
| 24                                 | Pterygoid palate width                | -0.575        | -0.565        | -0.196 | 0.065  | 0.188  | -0.476 | -0.393 | 0.422  |
| 25                                 | Width of zygomatic arches             | -0.840        | <b>-0.855</b> | -0.265 | -0.229 | -0.027 | -0.129 | -0.203 | 0.231  |
| 26                                 | Mastoid width                         | -0.844        | <b>-0.890</b> | -0.163 | -0.030 | -0.049 | -0.038 | 0.024  | 0.060  |
| 27                                 | Occipital condyle width               | -0.663        | -0.586        | -0.008 | 0.241  | -0.115 | 0.126  | 0.032  | 0.181  |
| 28                                 | Canine height                         | -0.710        | -0.738        | -0.096 | -0.178 | 0.300  | 0.168  | 0.212  | 0.053  |
| 29                                 | Length of P <sup>3</sup>              | -0.763        | -0.845        | 0.507  | 0.338  | -0.205 | -0.025 | 0.038  | -0.209 |
| 30                                 | P <sup>3</sup> metacone length        | -0.550        | -0.460        | 0.363  | -0.169 | -0.189 | 0.008  | 0.149  | -0.496 |
| 31                                 | P <sup>3</sup> paracone length        | -0.557        | -0.643        | 0.509  | 0.291  | -0.250 | -0.014 | 0.064  | -0.334 |
| 32                                 | P <sup>3</sup> parastyle length       | -0.306        | -0.595        | 0.408  | 0.457  | -0.381 | -0.008 | -0.190 | 0.017  |
| 33                                 | Width of P <sup>3</sup> at paracone   | -0.572        | -0.715        | 0.519  | 0.459  | -0.156 | -0.144 | -0.196 | -0.138 |
| 34                                 | Width of P <sup>3</sup> at metacone   | -0.652        | -0.788        | 0.523  | 0.371  | -0.134 | -0.064 | -0.205 | -0.117 |
| 35                                 | Length of P <sup>4</sup>              | -0.781        | -0.710        | 0.412  | 0.491  | 0.045  | 0.283  | 0.134  | -0.079 |
| 36                                 | P <sup>4</sup> metastyle length       | -0.474        | -0.557        | 0.372  | 0.522  | 0.155  | 0.227  | 0.053  | -0.029 |
| 37                                 | P <sup>4</sup> paracone length        | -0.744        | -0.637        | 0.439  | 0.363  | 0.164  | 0.002  | -0.060 | -0.025 |
| 38                                 | P <sup>4</sup> parastyle length       | -0.351        | -0.306        | 0.471  | 0.451  | -0.426 | 0.595  | 0.298  | -0.044 |
| 39                                 | Width of P <sup>4</sup> protocone     | -0.414        | -0.563        | 0.017  | 0.341  | 0.133  | 0.486  | 0.504  | -0.094 |
| 40                                 | Width of P <sup>4</sup> at protocone  | -0.574        | -0.441        | 0.386  | 0.569  | 0.427  | -0.294 | -0.189 | 0.313  |
| 41                                 | Width of P <sup>4</sup> at paracone   | -0.579        | -0.542        | 0.436  | 0.503  | 0.127  | -0.091 | -0.106 | 0.161  |
| Percentage of variance             |                                       | 48.0          | 48.2          | 9.4    | 10.9   | 4.5    | 5.6    | 4.4    | 4.5    |
| (Total PC 1-4: ♀ = 66.2; ♂ = 69.1) |                                       |               |               |        |        |        |        |        |        |

<sup>a</sup> A: Height of narial aperture from ventral part of I<sup>3</sup> alveolus to ventral part of nasal; <sup>b</sup> B: Dorsoventral height of snout, taken just posterior to C<sup>1</sup>; <sup>c</sup> C: Dorsoventral height of cranium taken at P<sup>3</sup>/P<sup>4</sup>; <sup>d</sup> D: Dorsoventral height of cranium taken at pterygoid; <sup>e</sup> Height of anterior part of zygomatic arch at jugal/maxilla junction; <sup>f</sup> Width across nasals at narial aperture; <sup>g</sup> Width across nasals at maxilla/frontal suture.

**Table S4: Sources and details of the specimens or photographs included in the pelage analysis.**

| No | Putative subspecies         | Institution <sup>§</sup> | Specimen no. | Geographical origin                                      |
|----|-----------------------------|--------------------------|--------------|----------------------------------------------------------|
| 1  | <i>altaica</i>              | BMNH                     | 70.2.10.1    | Manchuria                                                |
| 2  | <i>altaica</i>              | RMNH                     | 19925        | Captive Leipzig                                          |
| 3  | <i>altaica</i>              | RMNH                     | k            | Nord-est de l'Asie environs de Vladivostock              |
| 4  | <i>altaica</i><br>type      | RMNH                     | 13/f         | Corai                                                    |
| 5  | <i>altaica</i>              | CN                       | CN5698       | Zoo                                                      |
| 6  | <i>altaica</i>              | CN                       | CN5697       | Zoo                                                      |
| 7  | <i>altaica</i>              | NMS                      | Z.2001.49    | Vostok II, Krasnoyarmeysky Raion, Primorsky Krai, Russia |
| 8  | <i>altaica</i>              | *                        | -            | Amur-Ussuri Region                                       |
| 9  | <i>altaica</i>              | ZMM*                     | S50146       | L tributary C Amur                                       |
| 10 | <i>altaica</i>              | ZIASSP*                  | 3029         | Sidemi River, S Ussuri region                            |
| 11 | <i>altaica</i>              | ZIASSP*                  | 2980         | C Amur                                                   |
| 12 | <i>altaica</i>              | ZMM*                     | S55281       | Khabarovsk region                                        |
| 13 | <i>altaica</i>              | ZMM*                     | S55280       | Khabarovsk region                                        |
| 14 | <i>altaica</i>              | ZMM*                     | S55279       | Khabarovsk region                                        |
| 15 | <i>altaica</i>              | ZMM*                     | S29654       | Amur                                                     |
| 16 | <i>altaica</i>              | ZMM*                     | S55284       | Khabarovsk region                                        |
| 17 | <i>altaica</i>              | ZMM*                     | S29664       | Khar River tributary of Pikhtsy, tributary of Amur River |
| 18 | <i>altaica</i>              | ZMB                      | 68380        | Khabarovsk region                                        |
| 19 | <i>amoyensis</i>            | ZMB                      | 52574        | South China                                              |
| 20 | <i>amoyensis</i>            |                          |              | Fuzhou                                                   |
| 21 | <i>amoyensis</i>            |                          |              | Unknown                                                  |
| 22 | <i>amoyensis</i>            |                          |              | Qinlin, Shanxi                                           |
| 23 | <i>amoyensis</i>            |                          |              | Zhejiang                                                 |
| 24 | <i>balica</i>               | BMNH                     | 1938.3.14.5  | Bali                                                     |
| 25 | <i>balica</i>               | BMNH                     | 1937.12.1.2  | Sandang, Bali                                            |
| 26 | <i>balica</i>               | RMNH                     | 26135        | Sendang, Bali                                            |
| 27 | <i>balica</i>               | MZB                      | 6834         | Bali                                                     |
| 28 | <i>corbetti</i><br>holotype | BMNH                     | 33.4.1.203   | Luangtri, Annam                                          |
| 29 | <i>corbetti</i>             | BMNH                     | 33.4.1.204   | Laobao, Annam                                            |
| 30 | <i>corbetti</i>             | BMNH                     | 32.11.9.1    | Thaungyiu Valley, Amherst, Burma                         |
| 31 | <i>corbetti</i>             | BMNH                     | 71.2464      | Thailand                                                 |
| 32 | <i>corbetti</i>             | BMNH                     | 50.503       | Sumprabum, Upper Burma                                   |
| 33 | <i>corbetti</i>             | Photo                    | confiscated  | Thailand3                                                |
| 34 | <i>corbetti</i>             | Photo                    | confiscated  | Thailand1                                                |
| 35 | <i>corbetti</i>             | Photo                    | confiscated  | Thailand2                                                |
| 36 | <i>corbetti</i>             | ZMB                      | 56034        | Tonkin, China                                            |
| 37 | <i>corbetti</i>             | ZMB                      | 56028        | Tonkin, China                                            |
| 38 | <i>corbetti</i>             | ZMB                      | 56026        | Tonkin, China                                            |
| 39 | <i>corbetti</i>             | RMNH                     | 16774        | Siam                                                     |
| 40 | “ <i>jacksoni</i> ”         | BMNH                     | 1937.1.2.1   | Perak, Federal Malay States                              |

|    |                              |         |                          |                                            |
|----|------------------------------|---------|--------------------------|--------------------------------------------|
| 41 | <i>"jacksoni"</i>            | BMNH    | 51.755                   | Takau Estate, Rantau, Federal Malay States |
| 42 | <i>"jacksoni"</i>            | BMNH    | 50.31                    | Federal Malay States                       |
| 43 | <i>sondaica</i><br>lectotype | RMNH    | 39216/c.                 | Partie occid. de Java                      |
| 44 | <i>sondaica</i>              | RMNH    | 1929                     | Java                                       |
| 45 | <i>sondaica</i>              | ZMB     | 3387                     | Java                                       |
| 46 | <i>sondaica</i>              | MZB     | 6033                     | Blita, West Java                           |
| 47 | <i>sondaica</i>              | Private |                          | Java                                       |
| 48 | <i>sumatrae</i><br>holotype  | BMNH    | 12.11.10.1               | Deli, Sumatra                              |
| 49 | <i>sumatrae</i>              | RMNH    | 925                      | Deli, Sumatra                              |
| 50 | <i>sumatrae</i>              | BMNH    | 35.4.6.1                 | Laboen Matingsi, S Sumatra                 |
| 51 | <i>sumatrae</i>              | BMNH    | 35.4.6.2                 | Laboen Maringsi, S Sumatra                 |
| 52 | <i>sumatrae</i>              | BMNH    | 35.4.6.3                 | Kota Boeni, S Sumatra                      |
| 53 | <i>sumatrae</i>              | BMNH    | 50.30                    | Sumatra                                    |
| 54 | <i>sumatrae</i>              | BMNH    | 39.335                   | Korinchi, Sumatra                          |
| 55 | <i>sumatrae</i>              | BMNH    | 39.334                   | Bencoolen, SW Sumatra                      |
| 56 | <i>sumatrae</i>              | RMNH    | unreg. (400<br>no.14)    | Sumatra                                    |
| 57 | <i>sumatrae</i>              | RMNH    | 17655                    | Padang, Sumatra                            |
| 58 | <i>sumatrae</i>              | RMNH    | unreg. (7046)            | Sumatra                                    |
| 59 | <i>sumatrae</i>              | RMNH    | 24912                    | Tandjung Morawa, Deli, Sumatra             |
| 60 | <i>sumatrae</i>              | RMNH    | e                        | Atjeh, Sumatra                             |
| 61 | <i>sumatrae</i>              | ZMB     | 56033                    | Medan, Sumatra                             |
| 62 | <i>sumatrae</i>              | ZMB     | 56035                    | Central Sumatra                            |
| 63 | <i>sumatrae</i>              | MZB     | 6827                     | Hatam Tegimamam, Sumatra                   |
| 64 | <i>tigris</i>                | BMNH    | 1938.8.12.4              | Kathiawar, Pal, N India                    |
| 65 | <i>tigris</i>                | NMS     | unregistered             | India                                      |
| 66 | <i>tigris</i>                | BMNH    | 34.11.28.1               | near Mercara, Coorg, S India               |
| 67 | <i>tigris</i>                | BMNH    | 1938.8.12.7              | Damoh, C. Provinces, C. India              |
| 68 | <i>tigris</i>                | BMNH    | 1939.1643                | C India                                    |
| 69 | <i>tigris</i>                | BMNH    | 42.8.6.5                 | Deccan, S india                            |
| 70 | <i>tigris</i>                | BMNH    | 32.3.2.1                 | Travancore, S India                        |
| 71 | <i>tigris</i>                | BMNH    | 1983.307                 | Seoni, C. Provinces, India                 |
| 72 | <i>tigris</i>                | BMNH    | 82.12.10.1               | Bengal, N India                            |
| 73 | <i>tigris</i>                | BMNH    | 1938.8.12.6              | Ghodasgaou, E india                        |
| 74 | <i>tigris</i>                | BMNH    | 24.10.5.2                | Palaman, E India                           |
| 75 | <i>tigris</i>                | BMNH    | 30.10.14.1               | C India                                    |
| 76 | <i>tigris</i>                | BMNH    | 32.4.16.1                | Nepal Terai                                |
| 77 | <i>tigris</i>                | NMS     | Z.1961.62.Mc<br>Neil 972 | India                                      |
| 78 | <i>tigris</i>                | RMNH    | 45                       | Bengale                                    |
| 79 | <i>tigris</i>                | BMNH    | 2007.355                 | Assam                                      |
| 80 | <i>tigris</i>                | BMNH    | 1938.8.12.2              | Motipur                                    |
| 81 | <i>tigris</i>                | BMNH    | 24.10.5.1                | Palamau, Chota Nagpur                      |
| 82 | <i>tigris</i>                | BMNH    | 1938.8.12.1              | Sohelwa=Sohela                             |
| 83 | <i>tigris</i>                | BMNH    | 42.1                     | Gaya, Bihar                                |
| 84 | <i>tigris</i>                | BMNH    | 29.9.6.1                 | Sohagpur, Rewa state                       |
| 85 | <i>tigris</i>                | BMNH    | 78.2440                  | Kakartulla, Jubbelpore                     |
| 86 | <i>tigris</i>                | BMNH    | 0.10.27.1                | Mirzapore                                  |

|     |                |         |              |                                                           |
|-----|----------------|---------|--------------|-----------------------------------------------------------|
| 87  | <i>tigris</i>  | BMNH    | 7.10.18.2    | Pennghot, Mirzapore, UP                                   |
| 88  | <i>tigris</i>  | BMNH    | 33.9.7.1     | Kotah state, Rajputana                                    |
| 89  | <i>tigris</i>  | BMNH    | 31.1.6.2     | UP, India                                                 |
| 90  | <i>tigris</i>  | BMNH    | 32.5.7.5     | Nepal Terai, UP, India                                    |
| 91  | <i>tigris</i>  | BMNH    | 82.950       | Bangladesh                                                |
| 92  | <i>tigris</i>  | BMNH    | 70.1014      | Terai Jungles, Bahraich, UP                               |
| 93  | <i>tigris</i>  | BMNH    | 70.1015      | Terai Jungles, Bahraich, UP                               |
| 94  | <i>tigris</i>  | BMNH    | 1938.8.12.5  | Katernian Ghat                                            |
| 95  | <i>tigris</i>  | BMNH    | 1998.370     | Peshawar, NWFP, India                                     |
| 96  | <i>tigris</i>  | BMNH    | 1998.372     | Peshawar, NWFP, India                                     |
| 97  | <i>tigris</i>  | BMNH    | 28.10.30.1   | Danta, Mahikanta, Gujerat                                 |
| 98  | <i>tigris</i>  | BMNH    | 49.398       | South India                                               |
| 99  | <i>tigris</i>  | BMNH    | 39.311       | Godavery River, CP                                        |
| 100 | <i>tigris</i>  | BMNH    | 32.5.7.4     | Balaghat District, CP                                     |
| 101 | <i>tigris</i>  | BMNH    | 32.5.7.2     | Raipur District, CP                                       |
| 102 | <i>tigris</i>  | BMNH    | 49.397       | Sankos River, S of Bhutan                                 |
| 103 | <i>tigris</i>  | RZSS    | Rajah        | Edinburgh Zoo 1964                                        |
| 104 | <i>tigris</i>  | RZSS    | Ranee        | Edinburgh Zoo 1964                                        |
| 105 | <i>tigris</i>  | NMS     | Z.2000.147   | Sada River, India                                         |
| 106 | <i>tigris</i>  | ZMB     | 66394        | Assam                                                     |
| 107 | <i>virgata</i> | BMNH    | 7.7.5.1      | N slopes of Mt Elburz                                     |
| 108 | <i>virgata</i> | BMNH    | 1886.10.15.1 | Karaol Khana on Bala Murghab R N<br>of Heart, Afghanistan |
| 109 | <i>virgata</i> | ZIASSP* | 3027         | Kirgiz Steppe, prob. Semirech'e                           |
| 110 | <i>virgata</i> | ZMM*    | S33151       | Lower Ili, 250km Nof                                      |
| 111 | <i>virgata</i> | ZIASSP* | 2983         | Lobnor, e turkestan                                       |
| 112 | <i>virgata</i> | ZIASSP* | 8679         | Ferghana                                                  |
| 113 | <i>virgata</i> | ZIASSP* | 2981         | Turkestan                                                 |
| 114 | <i>virgata</i> | ZMM*    | S52871       | Upper Pyandzh, Tadjikistan                                |

<sup>§</sup> see table S1 and S2 and MZB (Museum Zoologicum Bogoriense, Indonesia); NMS (National Museums Scotland); RZSS (Royal Zoological Society of Scotland photos); ZIASSP (Zoological Institute, Academy of Sciences, St Petersburg); ZMM (Zoological Museum, Moscow State University).

\* from photos in Heptner and Sludskii (72).

**Table S5: Means and SDs for the six pelage characters across the nine putative subspecies.**

| Putative subspecies | Flank stripes |                | Tail stripes* |               | Spots* |               | Stripe thickness* |               | Stripes on quarters* |               | Loops on flanks* |               |
|---------------------|---------------|----------------|---------------|---------------|--------|---------------|-------------------|---------------|----------------------|---------------|------------------|---------------|
|                     | N             | Mean<br>± SD   | N             | Mean<br>± SD  | N      | Mean<br>± SD  | N                 | Mean<br>± SD  | N                    | Mean<br>± SD  | N                | Mean<br>± SD  |
| <i>altaica</i>      | 18            | 21.25<br>±1.76 | 18            | 1.06<br>±0.24 | 18     | 2.89<br>±0.32 | 18                | 1.67<br>±0.84 | 18                   | 1.33<br>±0.49 | 18               | 1.39<br>±0.70 |
| <i>amoyensis</i>    | 5             | 23.40<br>±1.52 | 5             | 1<br>NA       | 5      | 1.8<br>±1.10  | 5                 | 2<br>NA       | 5                    | 1<br>NA       | 5                | 1.4<br>±0.89  |
| <i>balica</i>       | 4             | 27.50<br>±4.45 | 4             | 1.00<br>NA    | 4      | 1.25<br>±0.50 | 4                 | 1.00<br>NA    | 4                    | 2.00<br>±1.15 | 4                | 1.50<br>±1.00 |
| <i>corbetti</i>     | 11            | 23.18<br>±2.15 | 11            | 1.27<br>±0.65 | 11     | 1.45<br>±0.69 | 11                | 1.64<br>±0.81 | 11                   | 1.64<br>±0.67 | 11               | 1.64<br>±0.67 |
| <i>jacksoni</i>     | 3             | 22.83<br>±0.29 | 3             | 1.33<br>±0.58 | 3      | 2.00<br>±1.00 | 3                 | 1.67<br>±1.15 | 3                    | 2.33<br>±0.58 | 3                | 1.67<br>±1.15 |
| <i>sondaica</i>     | 5             | 25.2<br>±3.42  | 5             | 1.20<br>±0.45 | 5      | 1.40<br>±0.55 | 5                 | 1.40<br>±0.55 | 5                    | 1.80<br>±0.84 | 5                | 2.00<br>±1.00 |
| <i>sumatrae</i>     | 17            | 25.41<br>±3.32 | 16            | 1.38<br>±0.72 | 17     | 1.18<br>±0.39 | 17                | 1.88<br>±0.70 | 17                   | 2.12<br>±0.78 | 17               | 1.88<br>±0.99 |
| <i>tigris</i>       | 43            | 22.19<br>±2.73 | 43            | 1.14<br>±0.42 | 43     | 2.02<br>±0.83 | 43                | 2.05<br>±0.82 | 43                   | 2.09<br>±0.81 | 43               | 1.53<br>±0.63 |
| <i>virgata</i>      | 8             | 24.00<br>±2.20 | 6             | 1.33<br>±0.52 | 8      | 2.75<br>±0.46 | 8                 | 1.13<br>±0.35 | 8                    | 1.88<br>±0.83 | 8                | 1.88<br>±0.64 |

\* measured in a semi-quantative scale.

**Table S6: The six pelage characters and their contribution to the first four principal components. Values with high loadings are marked in italic.**

| No                                              | Character                                           | PC 1         | PC2    | PC3    | PC4    |
|-------------------------------------------------|-----------------------------------------------------|--------------|--------|--------|--------|
| 1                                               | Average number of flank stripes<br>(left and right) | -0.535       | -0.401 | 0.548  | 0.040  |
| 2                                               | Tail stripes                                        | -0.611       | -0.101 | -0.549 | 0.255  |
| 3                                               | Spottiness                                          | <i>0.703</i> | 0.110  | -0.213 | 0.388  |
| 4                                               | Stripe thickness                                    | -0.014       | -0.689 | -0.553 | -0.119 |
| 5                                               | Stripes on quarters                                 | -0.228       | 0.553  | -0.271 | -0.665 |
| 6                                               | Loops on flanks                                     | -0.455       | 0.522  | -0.084 | 0.546  |
| Percentage of variance<br>(Total PC 1-4 = 77.5) |                                                     | 23.5         | 22.4   | 16.2   | 15.5   |



**Table S7: Number of occurrence records including the references for each of the nine putative subspecies used for the PCA and for the species distribution modeling (see Materials and Methods for details).**

| <b>Reference</b>                                                             | <b>VIR</b> | <b>ALT</b> | <b>AMO</b> | <b>COR</b> | <b>TIG</b> | <b>JAC</b> | <b>SUM</b> | <b>SON</b> | <b>BAL</b> |
|------------------------------------------------------------------------------|------------|------------|------------|------------|------------|------------|------------|------------|------------|
| Kitchener & Dugmore<br>(13) based on Mazak<br>(43)                           | 101        | 106        | 25         | 49         | 128        | 12         | 15         | 10         | 1          |
| Added occurrence<br>records from the Tiger<br>Conservation<br>Landscapes (3) | -          | 6          | -          | 2          | -          | 3          | 5          | -          | -          |
| Added occurrence<br>records from localities<br>of museum specimens<br>(73)   | -          | -          | -          | -          | -          | -          | -          | 2          | 5          |
| randomly added points<br>within their former<br>distribution                 | -          | -          | -          | -          | -          | -          | -          | 3          | 9          |
| <b>Total = 482</b>                                                           | <b>101</b> | <b>112</b> | <b>25</b>  | <b>51</b>  | <b>128</b> | <b>15</b>  | <b>20</b>  | <b>15</b>  | <b>15</b>  |

**Table S8: Definitions of the four functional habitats and the eco-regions assigned to them.**

| <b>Functional habitat</b>       | <b>comprising the following eco-regions</b>                                                                                                                                                                                                                                                                             |
|---------------------------------|-------------------------------------------------------------------------------------------------------------------------------------------------------------------------------------------------------------------------------------------------------------------------------------------------------------------------|
| forest                          | Tropical and subtropical moist broadleaf forests;<br>Tropical and subtropical dry broadleaf forests;<br>Tropical and subtropical coniferous forests;<br>Temperate broadleaf and mixed forests;<br>Temperate Coniferous Forests;<br>Boreal forests/taiga;<br>Mediterranean forests,<br>Woodlands and scrub;<br>Mangroves |
| grasslands & shrublands         | Tropical and subtropical grasslands, savannas and shrublands;<br>Temperate grasslands, savannas, and shrublands;<br>Flooded grasslands and savannas;<br>Montane grasslands and shrublands                                                                                                                               |
| deserts and xeric<br>shrublands | Deserts and xeric shrublands                                                                                                                                                                                                                                                                                            |

**Table S9: List of the tiger prey species. Prey species were grouped into seven functional groups.**

| <b>Prey group</b>                | <b>Genera</b>                                                                                                                                            |
|----------------------------------|----------------------------------------------------------------------------------------------------------------------------------------------------------|
| Very large ruminant              | <i>Alces</i> (43, 74)<br><i>Bos</i> (43, 75–79)                                                                                                          |
| Small ruminant                   | <i>Capreolus</i> (43, 74)<br><i>Moschus</i> (43, 74)<br><i>Muntiacus</i> (43, 75, 77–81)                                                                 |
| Medium ruminant                  | <i>Axis</i> (43, 75, 76, 78, 82, 83)<br><i>Capricornis</i> (74, 77, 81)<br><i>Cervus</i> (43, 74)<br><i>Rucervus</i> (43, 76)<br><i>Rusa</i> (43, 75–83) |
| Primates                         | <i>Macaca</i> (76, 77, 80)<br><i>Semnopithecus</i> (75, 78, 83, 84)                                                                                      |
| Small difficult-to-catch mammals | <i>Arctonyx</i> (77)<br><i>Hystrix</i> (75, 77, 80, 81)                                                                                                  |
| Pigs                             | <i>Sus</i> (75–81, 83)                                                                                                                                   |
| Small mammals                    | <i>Lepus</i> (43, 75, 78)                                                                                                                                |

**Table S10: The 29 ecological variables and their contribution to the first four principal components. The functional prey groups (variables 20 – 26) are defined in Table S9; the functional habitats (variables 27 – 29) are defined in Table S8. Values with very high loadings are marked in bold and with high loadings in italic.**

| No                           | Covariates                                       | PC 1          | PC2          | PC3          | PC4    |
|------------------------------|--------------------------------------------------|---------------|--------------|--------------|--------|
| <b>Continuous variables</b>  |                                                  |               |              |              |        |
| 1                            | Annual mean temperature                          | <b>0.904</b>  | 0.407        | 0.033        | -0.071 |
| 2                            | Mean diurnal range                               | -0.479        | 0.455        | 0.095        | 0.227  |
| 3                            | Isothermality <sup>§</sup>                       | <b>0.860</b>  | -0.121       | -0.249       | 0.046  |
| 4                            | Temperature seasonality <sup>#</sup>             | <b>-0.953</b> | -0.089       | 0.040        | -0.006 |
| 5                            | Max. temperature of warmest month                | 0.481         | <i>0.791</i> | 0.062        | -0.116 |
| 6                            | Min. temperature of coldest month                | <b>0.950</b>  | 0.266        | -0.056       | -0.053 |
| 7                            | Temperature annual range <sup>†</sup>            | <b>-0.954</b> | 0.019        | 0.095        | 0.015  |
| 8                            | Mean temperature of wettest quarter <sup>‡</sup> | 0.690         | 0.102        | 0.432        | -0.253 |
| 9                            | Mean temperature of driest quarter <sup>‡</sup>  | <i>0.772</i>  | 0.524        | -0.228       | 0.048  |
| 10                           | Mean temperature of warmest quarter <sup>‡</sup> | 0.646         | 0.670        | 0.076        | -0.142 |
| 11                           | Mean temperature of coldest quarter <sup>‡</sup> | <b>0.944</b>  | 0.297        | -0.005       | -0.043 |
| 12                           | Annual precipitation                             | <i>0.839</i>  | -0.443       | 0.100        | 0.193  |
| 13                           | Precipitation of wettest month                   | <i>0.725</i>  | -0.233       | 0.448        | 0.317  |
| 14                           | Precipitation of driest month                    | 0.532         | -0.519       | -0.533       | -0.153 |
| 15                           | Precipitation seasonality <sup>†</sup>           | -0.016        | 0.427        | <i>0.759</i> | 0.214  |
| 16                           | Precipitation of wettest quarter <sup>‡</sup>    | <i>0.754</i>  | -0.263       | 0.425        | 0.319  |
| 17                           | Precipitation of driest quarter <sup>‡</sup>     | 0.575         | -0.524       | -0.507       | -0.126 |
| 18                           | Precipitation of warmest quarter <sup>‡</sup>    | 0.489         | -0.563       | 0.262        | 0.279  |
| 19                           | Precipitation of coldest quarter <sup>‡</sup>    | 0.545         | -0.369       | -0.502       | -0.063 |
| <b>Categorical variables</b> |                                                  |               |              |              |        |
| 20                           | Very large ruminant absent                       | 0.619         | 0.505        | -0.360       | 0.105  |
| 20                           | Very large ruminant present                      | -1.526        | -1.245       | 0.887        | -0.258 |
| 21                           | Small ruminant absent                            | -2.205        | <b>3.085</b> | -2.253       | 0.935  |
| 21                           | Small ruminant present                           | 0.341         | -0.477       | 0.348        | -0.144 |
| 22                           | Medium ruminant absent                           | <b>3.589</b>  | -1.276       | -1.125       | 0.803  |
| 22                           | Medium ruminant present                          | -1.086        | 0.386        | 0.340        | -0.243 |
| 23                           | Primates absent                                  | -2.807        | -0.519       | 0.137        | 0.005  |
| 23                           | Primates present                                 | 2.257         | 0.417        | -0.110       | -0.004 |
| 24                           | Small difficult to catch mammals absent          | <b>-3.427</b> | -0.227       | -0.519       | 0.003  |
| 24                           | Small difficult to catch mammals present         | 2.850         | 0.189        | 0.432        | -0.002 |
| 25                           | Pigs absent                                      | -2.964        | -0.806       | 0.919        | 1.499  |
| 25                           | Pigs present                                     | 0.271         | 0.074        | -0.084       | -0.137 |
| 26                           | Small mammals absent                             | -0.922        | 1.311        | -1.901       | 0.773  |
| 26                           | Small mammals present                            | 0.279         | -0.396       | 0.575        | -0.234 |
| 27                           | Forest                                           | 0.950         | -0.608       | 0.441        | -0.123 |
| 28                           | Grasslands & shrublands                          | <b>-3.688</b> | -0.152       | -0.541       | 0.287  |
| 29                           | Deserts & xeric shrublands                       | -1.459        | <b>3.093</b> | -1.684       | 0.353  |
| Percentage of variance       |                                                  | 43.4          | 16.2         | 11.6         | 4.3    |
| (Total PC 1-4 = 75.6)        |                                                  |               |              |              |        |

<sup>§</sup>(Mean diurnal range/ temperature annual range)\*100; <sup>#</sup>standard deviation of annual mean temperature \*100; <sup>†</sup>Max. temperature/precipitation of warmest/wettest month - Min. temperature/precipitation of coldest/driest month; <sup>‡</sup>period of three months

**Table S11: Simulation of bootstrap values of nodes pooling two, three, or four putative subspecies in the neighbor-joining tree. Subspecies were permuted in the Euclidean distance matrices for each of 1000 bootstrap runs the mean, median and 95 % confidence intervals (CI) were calculated.**

| Character | No of pooled<br>"subspecies" | No of pooled |   |   |
|-----------|------------------------------|--------------|---|---|
|           |                              | 2            | 3 | 4 |
| Skull ♂   | Mean                         | 7            | 2 | 1 |
|           | Median                       | 6            | 2 | 1 |
|           | 95%CI low                    | 2            | 1 | 0 |
|           | 95%CI high                   | 23           | 5 | 2 |
| Skull ♀   | Mean                         | 7            | 2 | 1 |
|           | Median                       | 6            | 2 | 1 |
|           | 95%CI low                    | 3            | 1 | 0 |
|           | 95%CI high                   | 13           | 4 | 2 |
| Skin      | Mean                         | 8            | 2 | 1 |
|           | Median                       | 7            | 2 | 1 |
|           | 95%CI low                    | 2            | 0 | 0 |
|           | 95%CI high                   | 17           | 5 | 2 |
| Ecology   | Mean                         | 7            | 2 | 1 |
|           | Median                       | 6            | 1 | 1 |
|           | 95%CI low                    | 2            | 1 | 0 |
|           | 95%CI high                   | 17           | 4 | 3 |

**Table S12: Niche overlap between putative subspecies as computed by ENMTools.**

| I \ D*     | VIR  | ALT  | AMO  | COR         | TIG         | JAC         | SUM         | SON         | BAL         |
|------------|------|------|------|-------------|-------------|-------------|-------------|-------------|-------------|
| <b>VIR</b> | -    | 0.05 | 0.04 | 0.00        | 0.00        | 0.00        | 0.00        | 0.00        | 0.00        |
| <b>ALT</b> | 0.19 | -    | 0.06 | 0.00        | 0.01        | 0.00        | 0.00        | 0.00        | 0.00        |
| <b>AMO</b> | 0.19 | 0.21 | -    | 0.23        | 0.07        | 0.00        | 0.00        | 0.00        | 0.00        |
| <b>COR</b> | 0.01 | 0.03 | 0.45 | -           | <i>0.34</i> | 0.21        | 0.01        | 0.16        | 0.22        |
| <b>TIG</b> | 0.03 | 0.07 | 0.26 | <i>0.64</i> | -           | 0.05        | 0.00        | 0.02        | 0.05        |
| <b>JAC</b> | 0.01 | 0.00 | 0.00 | 0.33        | 0.11        | -           | <b>0.62</b> | <i>0.38</i> | 0.22        |
| <b>SUM</b> | 0.01 | 0.00 | 0.00 | 0.06        | 0.01        | <b>0.86</b> | -           | <b>0.57</b> | <i>0.29</i> |
| <b>SON</b> | 0.00 | 0.00 | 0.00 | 0.34        | 0.08        | <i>0.71</i> | <b>0.82</b> | -           | <b>0.58</b> |
| <b>BAL</b> | 0.00 | 0.00 | 0.00 | 0.41        | 0.12        | 0.40        | <i>0.55</i> | <b>0.80</b> | -           |

\* bold numbers indicate a very high niche overlap ( $I > 0.75$  and  $D > 0.5$ ) and italic numbers indicate high niche overlap ( $I > 0.5$  and  $D > 0.25$ )

**Table S13: Sources and details of specimens included in the molecular analysis in addition to the sequences from Luo *et al.* (8), Driscoll *et al.* (16), and GenBank accession no. JF357969 (11) (SUM9).**

| No | Haplotype | Museum* | Specimen No | Geographical origin |
|----|-----------|---------|-------------|---------------------|
| 1  | BAL1      | ZMH     | S9350       | Bali                |
| 2  | BAL2      | SMNS    | 18923       | Bali, Medewi        |
| 3  | BAL2      | SMNS    | 18922       | Bali, Poeloekan     |
| 4  | SON1      | MTD     | B16443      | Java                |
| 5  | SON2      | ZMB     | 14367       | Java                |
| 6  | SON2      | ZMB     | 56039       | Java                |
| 7  | SON3      | ZMB     | 3387        | Java                |
| 8  | SON3      | ZMB     | 14365       | Java                |
| 9  | SON3      | ZMB     | 14369       | Java                |
| 10 | SON3      | ZMB     | 28793       | Java                |
| 11 | SON3      | IRSNB   | 908C        | Java                |
| 12 | SON3      | IRSNB   | 908B        | Java                |
| 13 | SON4      | ZMB     | 14366       | Java                |
| 14 | SON5      | ZMB     | 56042       | Java                |
| 15 | SON6      | IRSNB   | 907F        | Java                |

\* see Table S1, S2 and S4 and ZMH: Zoological Museum Hamburg; MTD: Senckenberg Naturhistorische Sammlungen, Dresden; IRSNB: Institut Royal des Sciences Naturelles de Belgique, Brussels.

**Table S14: Details of mitochondrial primer sets used in addition to the eight primer sets described by Driscoll *et al.* (16).**

| Name         | Sequence                   |
|--------------|----------------------------|
| PTI-cytb-1-F | ATGCACGTAGGACGAGGAAT       |
| PTI-cytb-1-R | TTTGGCCTCATGGTAAGACA       |
| PTI-ND1-1-F  | TTATTTTTTCGGAGCATTCCA      |
| PTI-ND1-1-R  | TCATAGGAGGTGCATTAATTGG     |
| PTI-ND5-2-F  | CAACTCCCTAAGCCCAATCA       |
| PTI-ND5-2-R  | CCACGAGGTTAAGCTCTAATGC     |
| PTI-12S-1-F  | CCCTAAACCTAGATAGTTAACCCAAA |
| PTI-12S-1-R  | AAGATACTTGTGCTTACTTTTCTTCC |

**Table S15. Population summary statistics calculated for the short and long mtDNA data sets.**

| Group                            | Dataset | N   | S  | H  | Hd               | $\pi$                | tD     | D*     | F*     | Fs     |
|----------------------------------|---------|-----|----|----|------------------|----------------------|--------|--------|--------|--------|
| <i>Panthera tigris</i>           | 1772bp  | 121 | 36 | 23 | 0.892<br>(0.018) | 0.00342<br>(0.00011) | -0.292 | 0.537  | 0.242  | -1.68  |
| <i>Panthera tigris</i><br>– AMO1 | 1772bp  | 119 | 31 | 22 | 0.888<br>(0.018) | 0.00336<br>(0.00011) | 0.083  | 0.285  | 0.245  | -1.367 |
| Continental<br>tigers – AMO1     | 1772bp  | 87  | 16 | 11 | 0.807<br>(0.029) | 0.00266<br>(0.00012) | 1.377  | 1.618* | 1.82*  | 2.272  |
| Sunda tigers                     | 1772bp  | 32  | 13 | 13 | 0.869<br>(0.036) | 0.00132<br>(0.00017) | -0.904 | -1.200 | -1.299 | -3.251 |
| <i>Panthera tigris</i>           | 3968bp  | 121 | 58 | 31 | 0.930<br>(0.011) | 0.00251<br>(0.00005) | -0.246 | -0.022 | -0.140 | -1.812 |
| <i>Panthera tigris</i><br>– AMO1 | 3968bp  | 119 | 51 | 30 | 0.927<br>(0.012) | 0.00247<br>(0.00005) | 0.089  | -0.322 | -0.182 | -1.571 |
| Continental<br>tigers – AMO1     | 3968bp  | 87  | 58 | 31 | 0.930<br>(0.011) | 0.00251<br>(0.00005) | -0.246 | -0.022 | -0.140 | -1.812 |
| Sunda tigers                     | 3968bp  | 32  | 16 | 12 | 0.885<br>(0.032) | 0.00065<br>(0.00009) | -1.177 | -1.491 | -1.635 | -3.757 |

N: Number of individuals; S: Number of Polymorphic Sites. H: Number of haplotypes. Hd: haplotype diversity (SD);  $\pi$ : Nucleotide diversity(SD); tD: Tajima's D. D\*: Fu and Li's D\* test. F\*: Fu and Li F\* test Statistics. Fs: Fu's Fs Statistics. \*: significant at the 5% level.

**Table S16. Nucleotide diversity of pantherine cats.**

| Species                  | N   | mtDNA loci                     | Length [bp] | $\pi$                     | Reference  |
|--------------------------|-----|--------------------------------|-------------|---------------------------|------------|
| <i>Panthera tigris</i>   | 121 | multiple                       | 1772        | 0.00342<br>(0.00011)      | this study |
| <i>Panthera tigris</i>   | 121 | multiple                       | 3986        | 0.00251<br>(0.00005)      | this study |
| <i>Panthera onca</i>     | 37  | Control region                 | 715         | 0.00771<br>(0.0001)       | (85)       |
| <i>Panthera pardus</i>   | 69  | ND5 & Control region           | 611         | 0.0121<br>(0.0062)        | (86)       |
| <i>Panthera leo</i>      | 357 | 12S & 16S                      | 1882        | 0.0066                    | (87)       |
| <i>Neofelis nebulosa</i> | 58  | ATPase8, Cytb & Control region | 849         | -<br>0.00057<br>(0.00055) | (26)       |
| <i>Neofelis diardi</i>   | 31  | ATPase8, Cytb & Control region | 846         | 0.0037<br>(0.00219)       | (26)       |

N: Number of individuals;  $\pi$ : Nucleotide diversity(SD).

**Table S17. Divergence dates in years before present derived from the short and long mtDNA data sets.**

| Clade                            | Dataset | Mean    | Median  | Geometric Mean | 5% lower boundary | 95% upper boundary |
|----------------------------------|---------|---------|---------|----------------|-------------------|--------------------|
| <i>Panthera tigris</i>           | 1772bp  | 157,350 | 139,480 | 143,770        | 53,343            | 296,010            |
| <i>Panthera tigris</i><br>– AMO1 | 1772bp  | 108,860 | 99,611  | 101,330        | 41,783            | 192,010            |
| Sunda region                     | 1772bp  | 45,259  | 41,012  | 41,183         | 13,564            | 84,759             |
| <i>Panthera tigris</i>           | 3968bp  | 150,630 | 131,470 | 137,130        | 54,622            | 292,800            |
| <i>Panthera tigris</i><br>– AMO1 | 3968bp  | 104,220 | 93,951  | 96,883         | 42,104            | 189,790            |
| Sunda region                     | 3968bp  | 36,465  | 32,356  | 33,061         | 11,458            | 70,774             |

**Table S18: Pairwise comparison between the two tiger subspecies *P. tigris tigris* and *P. tigris sondaica* for the craniodental characteristics using the Mann-Whitney *U* test (♂:  $n_{tigris} = 64$ ,  $n_{sondaica} = 38$ ; ♀:  $n_{tigris} = 55$ ,  $n_{sondaica} = 44$ ).**

| No | Character                             | ♂     |        |                   | ♀      |        |                   |
|----|---------------------------------------|-------|--------|-------------------|--------|--------|-------------------|
|    |                                       | U     | p      | signifi-<br>cance | U      | p      | signifi-<br>cance |
| 1  | Condylbasal length                    | 506   | <0.001 | ***               | 376    | <0.001 | ***               |
| 2  | Posterior length                      | 872   | 0.017  | *                 | 778    | 0.002  | **                |
| 3  | Facial length                         | 662   | <0.001 | ***               | 488    | <0.001 | ***               |
| 4  | Upper canine width                    | 789   | 0.003  | **                | 948    | 0.066  | ns                |
| 5  | Height variable A <sup>a</sup>        | 487.5 | <0.001 | ***               | 442    | <0.001 | ***               |
| 6  | Height variable B <sup>b</sup>        | 409   | <0.001 | ***               | 456    | <0.001 | ***               |
| 7  | Height variable C <sup>c</sup>        | 322   | <0.001 | ***               | 412    | <0.001 | ***               |
| 8  | Height variable D <sup>d</sup>        | 537.5 | <0.001 | ***               | 496    | <0.001 | ***               |
| 9  | Zygomatic width <sup>e</sup>          | 976   | 0.097  | ns                | 698.5  | <0.001 | ***               |
| 10 | Nasal width <sup>f</sup>              | 705   | <0.001 | ***               | 691    | <0.001 | ***               |
| 11 | Nasal width <sup>g</sup>              | 669.5 | <0.001 | ***               | 673    | <0.001 | ***               |
| 12 | Width of muzzle                       | 868   | 0.016  | *                 | 947    | 0.065  | ns                |
| 13 | Interorbital width                    | 432   | <0.001 | ***               | 432    | <0.001 | ***               |
| 14 | Postorbital width                     | 690   | <0.001 | ***               | 607    | <0.001 | ***               |
| 15 | Postorbital constriction              | 580.5 | <0.001 | ***               | 634    | <0.001 | ***               |
| 16 | Braincase width                       | 822   | 0.006  | **                | 704    | <0.001 | ***               |
| 17 | Nasal length                          | 288.5 | <0.001 | ***               | 428    | <0.001 | ***               |
| 18 | Pterygoid palate length               | 654   | <0.001 | ***               | 466    | <0.001 | ***               |
| 19 | Ventral posterior length              | 533   | <0.001 | ***               | 542    | <0.001 | ***               |
| 20 | Width of incisors                     | 986   | 0.112  | ns                | 789    | 0.003  | **                |
| 21 | Width between canines                 | 625   | <0.001 | ***               | 586    | <0.001 | ***               |
| 22 | Width of palate across P <sup>3</sup> | 485   | <0.001 | ***               | 437    | <0.001 | ***               |
| 23 | Width of palate across P <sup>4</sup> | 530   | <0.001 | ***               | 492    | <0.001 | ***               |
| 24 | Pterygoid palate width                | 1221  | 0.975  | ns                | 1081.5 | 0.367  | ns                |

|    |                                      |       |        |     |       |        |     |
|----|--------------------------------------|-------|--------|-----|-------|--------|-----|
| 25 | Width of zygomatic arches            | 571   | <0.001 | *** | 468   | <0.001 | *** |
| 26 | Mastoid width                        | 505   | <0.001 | *** | 345   | <0.001 | *** |
| 27 | Occipital condyle width              | 818.5 | <0.001 | *** | 618   | <0.001 | *** |
| 28 | Canine height                        | 341.5 | <0.001 | *** | 475   | <0.001 | *** |
| 29 | Length of P <sup>3</sup>             | 551   | <0.001 | *** | 377   | <0.001 | *** |
| 30 | P <sup>3</sup> metacone length       | 840.5 | 0.009  | **  | 538   | <0.001 | *** |
| 31 | P <sup>3</sup> paracone length       | 605.5 | <0.001 | *** | 657.5 | <0.001 | *** |
| 32 | P <sup>3</sup> parastyle length      | 1101  | 0.428  | ns  | 1033  | 0.214  | ns  |
| 33 | Width of P <sup>3</sup> at paracone  | 996   | 0.129  | ns  | 891   | 0.025  | *   |
| 34 | Width of P <sup>3</sup> at metacone  | 597   | <0.001 | *** | 492   | <0.001 | *** |
| 35 | Length of P <sup>4</sup>             | 695   | <0.001 | *** | 276   | <0.001 | *** |
| 36 | P <sup>4</sup> metastyle length      | 1027  | 0.192  | ns  | 712.5 | <0.001 | *** |
| 37 | P <sup>4</sup> paracone length       | 772   | 0.002  | **  | 438   | <0.001 | *** |
| 38 | P <sup>4</sup> parastyle length      | 1093  | 0.397  | ns  | 1010  | 0.160  | ns  |
| 39 | Width of P <sup>4</sup> protocone    | 768.5 | 0.002  | **  | 815   | 0.005  | **  |
| 40 | Width of P <sup>4</sup> at protocone | 1441  | 0.120  | ns  | 1030  | 0.206  | ns  |
| 41 | Width of P <sup>4</sup> at paracone  | 1105  | 0.444  | ns  | 780   | 0.002  | **  |

<sup>a</sup> A: Height of narial aperture from ventral part of I<sup>3</sup> alveolus to ventral part of nasal; <sup>b</sup> B: Dorsoventral height of snout, taken just posterior to C<sup>1</sup>; <sup>c</sup> C: Dorsoventral height of cranium taken at P<sup>3</sup>/P<sup>4</sup>; <sup>d</sup> D: Dorsoventral height of cranium taken at pterygoid; <sup>e</sup> Height of anterior part of zygomatic arch at jugal/maxilla junction; <sup>f</sup> Width across nasals at narial aperture; <sup>g</sup> Width across nasals at maxilla/frontal suture.

\*\*\*: p<0.001; \*\*: p<0.01, \*: p < 0.05, ns = not significant

**Table S19: Pairwise comparison between the two tiger subspecies *P. tigris tigris* and *P. tigris sondaica* for pelage characteristics using the Mann-Whitney *U* test ( $n_{tigris} = 89$ ,  $n_{sondaica} = 25$ ).**

| Pelage characteristic | U    | p      | significance |
|-----------------------|------|--------|--------------|
| Flank stripes         | 1700 | <0.001 | ***          |
| Tails stripes         | 1121 | 0.295  | ns           |
| Spots                 | 469  | <0.001 | ***          |
| Stripe thickness      | 987  | 0.357  | ns           |
| Stripes on quarter    | 1325 | 0.121  | ns           |
| Loops on flanks       | 1227 | 0.384  | ns           |



**Table S20: Pairwise comparison between the two tiger subspecies *P. tigris tigris* and *P. tigris sondaica* for continuous ecological variables (climate) using the Mann-Whitney *U* test ( $n_{tigris} = 428$ ,  $n_{sondaica} = 50$ ).**

| <b>Ecological variable</b>          | <b>U</b> | <b>p</b> | <b>significance</b> |
|-------------------------------------|----------|----------|---------------------|
| Annual Mean Temperature             | 16597    | <0.001   | ***                 |
| Mean Diurnal Range                  | 5958     | <0.001   | ***                 |
| Isothermality                       | 21013    | <0.001   | ***                 |
| Temperature Seasonality             | 275      | <0.001   | ***                 |
| Max Temperature of Warmest Month    | 10010    | 0.456    | ns                  |
| Min Temperature of Coldest Month    | 19834    | <0.001   | ***                 |
| Temperature Annual Range            | 607      | <0.001   | ***                 |
| Mean Temperature of Wettest Quarter | 14224    | <0.001   | ***                 |
| Mean Temperature of Driest Quarter  | 16465    | <0.001   | ***                 |
| Mean Temperature of Warmest Quarter | 11289    | 0.525    | ns                  |
| Mean Temperature of Coldest Quarter | 19359    | <0.001   | ***                 |
| Annual Precipitation                | 19524    | <0.001   | ***                 |
| Precipitation of Wettest Month      | 16304    | <0.001   | ***                 |
| Precipitation of Driest Month       | 20334    | <0.001   | ***                 |
| Precipitation Seasonality           | 3342     | <0.001   | ***                 |
| Precipitation of Wettest Quarter    | 16857    | <0.001   | ***                 |
| Precipitation of Driest Quarter     | 20375    | <0.001   | ***                 |
| Precipitation of Warmest Quarter    | 17657    | <0.001   | ***                 |
| Precipitation of Coldest Quarter    | 20110    | <0.001   | ***                 |

**Table S21: Pairwise comparison between the two tiger subspecies *P. tigris tigris* and *P. tigris sondaica* for categorical ecological variables (functional prey groups and functional habitat) using Fisher's exact test ( $n_{tigris} = 428$ ,  $n_{sondaica} = 50$ ).**

| <b>Ecological variable</b>       | <b>p</b> | <b>significance</b> |
|----------------------------------|----------|---------------------|
| Very large ruminant              | <0.001   | ***                 |
| Small ruminant                   | <0.001   | ***                 |
| Medium ruminant                  | <0.001   | ***                 |
| Primates                         | <0.001   | ***                 |
| Small difficult to catch mammals | <0.001   | ***                 |
| Pigs                             | 0.015    | *                   |
| Small mammals                    | <0.001   | ***                 |
| Functional habitat               | <0.001   | ***                 |

\*\*\*:  $p < 0.001$ ; \*\*:  $p < 0.01$ , \*:  $p < 0.05$ , ns = not significant
